# Supplementary material for: Prevalence, Incidence, and Factors Associated with Posttraumatic Stress at Three-Month Follow-Up among New York City Healthcare Workers after the First Wave of the COVID-19 Pandemic
Source: MDPI journal article supplement (doi:10.3390/ijerph19010262), 2021-12-27
Supplement: s1 [file s1]

## Supplement

**Supplementary Figure S1:** PC-PTSD Questionnaire Symptom Domains across 10-week Follow-Up Period

**Supplementary Table S1:** Baseline characteristics of participants who agreed to participate in the longitudinal follow-up assessments (N=230) and those who did not agree to participate (N=597)

**Supplementary Table S2:** Baseline characteristics of participants who completed the 10-week follow-up assessment (N=88) and those who did not complete the 10-week follow-up assessment (N=142)

**Supplementary Table S3:** Generalized estimating equation (GEE) univariable and multivariable models to identify factors associated with PC-PTSD score  $\geq 3$  at 6-week follow-up

**Supplementary Figure S1:**

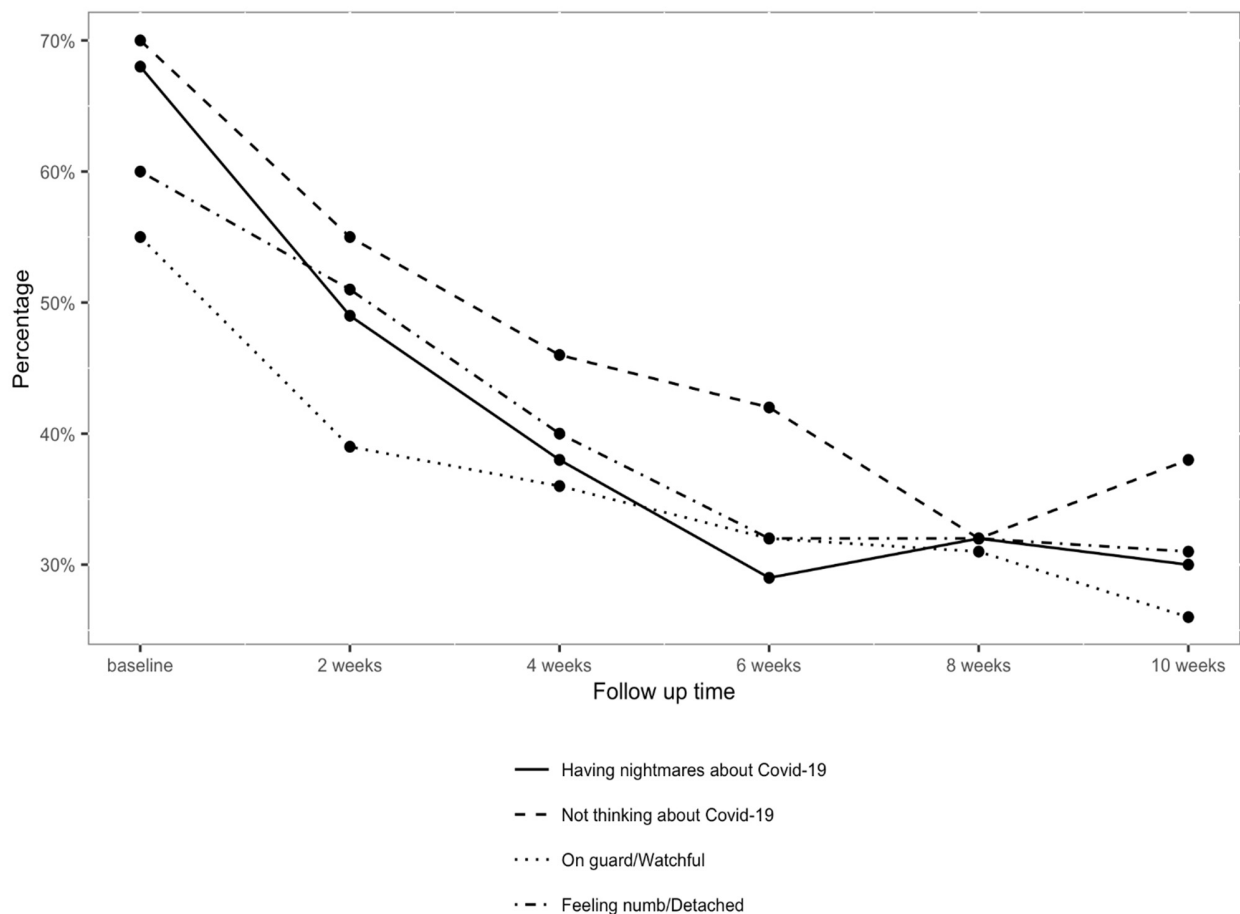

**Supplementary Table S1:** Baseline characteristics of participants who agreed to participate in the longitudinal follow-up assessments (N=230) and those who did not agree to participate (N=597)

|                                                                                                                                                                                 | <b>Agreed to participate<br/>(N=230)</b>                                               | <b>Did not agree to<br/>participate (N=597)</b>                                            | <b>P-value<sup>c</sup></b> |
|---------------------------------------------------------------------------------------------------------------------------------------------------------------------------------|----------------------------------------------------------------------------------------|--------------------------------------------------------------------------------------------|----------------------------|
| <b>Sex (N %)</b><br>Female<br>Male<br>Other                                                                                                                                     | 183 (79.6%)<br>46 (20.0%)<br>1 (0.4%)                                                  | 474 (80.6%)<br>114 (19.4%)<br>0 (0%)                                                       | 0.271                      |
| <b>Race (N %)</b><br>White<br>Asian<br>Black<br>Other<br>More than one race<br>Hawaiian/Pacific Islander<br>American Indian/Native American                                     | 148 (64.3%)<br>26 (11.3%)<br>21 (11.3%)<br>20 (8.7%)<br>14 (6.1%)<br>1 (0.4%)<br>0 (%) | 334 (55.9%)<br>105 (17.6%)<br>47 (7.9%)<br>68 (11.4%)<br>36 (6.0%)<br>3 (0.5%)<br>4 (0.7%) | 0.159                      |
| <b>Ethnicity (N %)</b><br>Not Hispanic or Latino<br>Hispanic or Latino                                                                                                          | 191 (86.8%)<br>29 (13.2%)                                                              | 485 (87.5%)<br>69 (12.5%)                                                                  | 0.784                      |
| <b>Clinical location (N %)</b><br>COVID-19 facing<br>Not COVID-19 facing                                                                                                        | 190 (82.6%)<br>40 (17.4%)                                                              | 480 (80.4%)<br>117 (19.6%)                                                                 | 0.468                      |
| <b>Hours worked in past week (at<br/>baseline)<sup>a</sup></b><br>Median (IQR)                                                                                                  | 41-50 hrs (31-40 h, 51-60 h)                                                           | 41-50 hrs (31-40 h, 51-60 h)                                                               | 0.093                      |
| <b>Role (N %)</b><br>Registered Nurse<br>Attending Physician<br>Resident/Fellow<br>Advanced Practice Provider<br>Other<br>Prefer not to answer                                  | 115 (50.0%)<br>50 (21.7%)<br>43 (18.7%)<br>13 (5.7%)<br>8 (3.5%)<br>1 (0.4%)           | 347 (58.1%)<br>95 (15.9%)<br>98 (17.9%)<br>48 (8.0%)<br>6 (1.0%)<br>3 (0.5%)               | 0.077                      |
| <b>Acute stress/PC-PTSD score<sup>b</sup></b><br>Median (IQR)                                                                                                                   | 3.00 (1.00, 4.00)                                                                      | 3.00 (2.00, 4.00)                                                                          | 0.116                      |
| <b>Dichotomized acute stress/PC-<br/>PTSD score</b><br>Moderate or severe acute<br>stress/PTSD (positive screen, ≥ 3<br>score)<br>None or mild acute stress/PTSD (<<br>3 score) | 127 (55.2%)<br>103 (44.8%)                                                             | 353 (59.1%)<br>244 (40.9%)                                                                 | 0.307                      |

<sup>a</sup> Selections were based on 13 categories: 0-10h, 11-20h, 21-30h, 31-40h, 41-50h, 51-60h, 61-70h, 71-80h, 91-100h, 101-110h, 111-120h, 120+h

<sup>b</sup> Ratings were based on the 4-item Primary Care PTSD screen (range 0-4)

<sup>c</sup> P-values are based on chi-squared/Fisher Exact test for categorical variables and Wilcoxon Rank-Sum test for continuous variables

PC-PTSD: primary care posttraumatic stress disorder

**Supplementary Table S2:** Baseline characteristics of participants who completed the 10-week follow-up assessment (N=88) and those who did not complete the 10-week follow-up assessment (N=142)

|                                                            | Did not complete 10-week assessment (N=142) | Completed 10-week assessment (N=88) | P-value <sup>b</sup> |
|------------------------------------------------------------|---------------------------------------------|-------------------------------------|----------------------|
| <b>Age (yrs), median (IQR)</b>                             | 35 (31 – 44.3)                              | 41 (32 - 53)                        | 0.004                |
| <b>Sex (N %)</b>                                           |                                             |                                     | 0.408                |
| Female                                                     | 114 (80.9%)                                 | 69 (77.5%)                          |                      |
| Male                                                       | 27 (19.1%)                                  | 19 (21.3%)                          |                      |
| Other                                                      | 0 (0%)                                      | 1 (1.1%)                            |                      |
| <b>Race (N %)</b>                                          |                                             |                                     | 0.334                |
| White                                                      | 84 (59.6%)                                  | 64 (71.9%)                          |                      |
| Asian                                                      | 16 (11.3%)                                  | 10 (11.2%)                          |                      |
| Black                                                      | 14 (9.9%)                                   | 7 (7.9%)                            |                      |
| Other                                                      | 16 (8.7%)                                   | 4 (4.5%)                            |                      |
| More than one race                                         | 10 (7.1%)                                   | 4 (4.5%)                            |                      |
| Hawaiian/Pacific Islander                                  | 1 (0.7%)                                    | 0 (0%)                              |                      |
| American Indian/Native American                            | 0 (%)                                       | 0 (0%)                              |                      |
| <b>Ethnicity (N %)</b>                                     |                                             |                                     | 0.302                |
| Not Hispanic or Latino                                     | 118 (83.7%)                                 | 73 (82%)                            |                      |
| Hispanic or Latino                                         | 23 (16.3%)                                  | 16 (18%)                            |                      |
| <b>Clinical location (N %)</b>                             |                                             |                                     | 0.020                |
| COVID-facing                                               | 123 (87.2%)                                 | 67 (75.3%)                          |                      |
| Not COVID-facing                                           | 18 (12.8%)                                  | 22 (24.7%)                          |                      |
| <b>Hours worked in past week (at baseline)<sup>a</sup></b> |                                             |                                     | 0.348                |
| Median (IQR)                                               | 41-50 hrs (31-40 h, 51-60 h)                | 41-50 hrs (31-40 h, 51-60 h)        |                      |
| <b>Role (N %)</b>                                          |                                             |                                     | 0.009                |
| Registered Nurse                                           | 78 (55.3%)                                  | 37 (41.6%)                          |                      |
| Attending Physician                                        | 19 (13.5%)                                  | 30 (33.7%)                          |                      |
| Resident                                                   | 23 (16.3%)                                  | 8 (9%)                              |                      |
| Advanced Practice Provider                                 | 0 (0%)                                      | 1 (1.1%)                            |                      |
| Fellow                                                     | 9 (6.4%)                                    | 3 (3.4%)                            |                      |
| Other                                                      | 11 (7.8%)                                   | 10 (11.2%)                          |                      |
| Prefer not to answer                                       | 1 (0.7%)                                    | 0 (0%)                              |                      |

<sup>a</sup> Selections were based on 13 categories: 0-10h, 11-20h, 21-30h, 31-40h, 41-50h, 51-60h, 61-70h, 71-80h, 91-100h, 101-110h, 111-120h, 120+h

<sup>b</sup> P-values are based on chi-squared/Fisher Exact test for categorical variables and Wilcoxon Rank-Sum test for continuous variables

**Supplementary Table S3:** Generalized estimating equation (GEE) univariable and multivariable models to identify factors associated with PC-PTSD score  $\geq 3$  at 6-week follow-up

|                                                                 | Univariable model |                   |                  | Multivariable model |                      |              |
|-----------------------------------------------------------------|-------------------|-------------------|------------------|---------------------|----------------------|--------------|
| Variable                                                        | B (SE)            | OR (95% CI)       | P-value          | B (SE)              | Adjusted OR (95% CI) | P-value      |
| <b>Age</b>                                                      | -0.02 (0.01)      | 0.98 (0.96, 1.00) | 0.061            | -0.02 (0.01)        | 0.98 (0.96, 1.00)    | 0.083        |
| <b>Role</b><br>(RN vs. other)                                   | 0.60 (0.24)       | 1.82 (1.13, 2.92) | <b>0.013</b>     | 0.43 (0.26)         | 1.54 (0.92, 2.55)    | 0.097        |
| <b>Sex</b><br>(female vs. male)                                 | 1.22 (0.32)       | 3.39 (1.80, 6.37) | <b>&lt;0.001</b> | 1.06 (0.33)         | 2.89 (1.52, 5.52)    | <b>0.001</b> |
| <b>Clinical location</b><br>(COVID-facing vs. not)              | 0.57 (0.21)       | 1.77 (1.17, 2.69) | <b>0.007</b>     | 0.46 (0.22)         | 1.58 (1.03, 2.45)    | <b>0.035</b> |
| <b>Work hours<sup>a</sup></b>                                   | 0.03 (0.04)       | 1.03 (0.96, 1.11) | 0.427            | 0.06 (0.04)         | 1.06 (0.98, 1.15)    | 0.128        |
| <b>Race/ethnicity</b><br>(White, non-Hispanic/Latino vs. other) | -0.48 (0.24)      | 0.62 (0.39, 0.98) | <b>0.042</b>     | -0.36 (0.25)        | 0.70 (0.43, 1.13)    | 0.146        |

B (SE): regression coefficient (standard error), OR (95% CI): odds ratio and 95% confidence interval; PC-PTSD: primary care posttraumatic stress disorder; RN: registered nurse

<sup>a</sup>Coefficients and ORs for “Work Hours” were calculated for 10h increments across the categories: 0-10h, 11-20h, 21-30h, 31-40h, 41-50h, 51-60h, 61-70h, 71-80h, 91-100h, 101-110h, 111-120h, 120+h
